# Supplementary material
Source: PubMed Central journal article supplement (PMC5704465)
Supplement: 10.1074_M117.799866_jbc.M117.799866-3.pdf [file 10.1074_M117.799866_jbc.M117.799866-3.pdf]

# Transient alkalization of the leaf apoplast stiffens the cell wall during onset of chloride-salinity in corn leaves

Christoph-Martin Geilfus, Raimund Tenhaken, and Sebastien Christian Carpentier

Supplemental Fig. S1

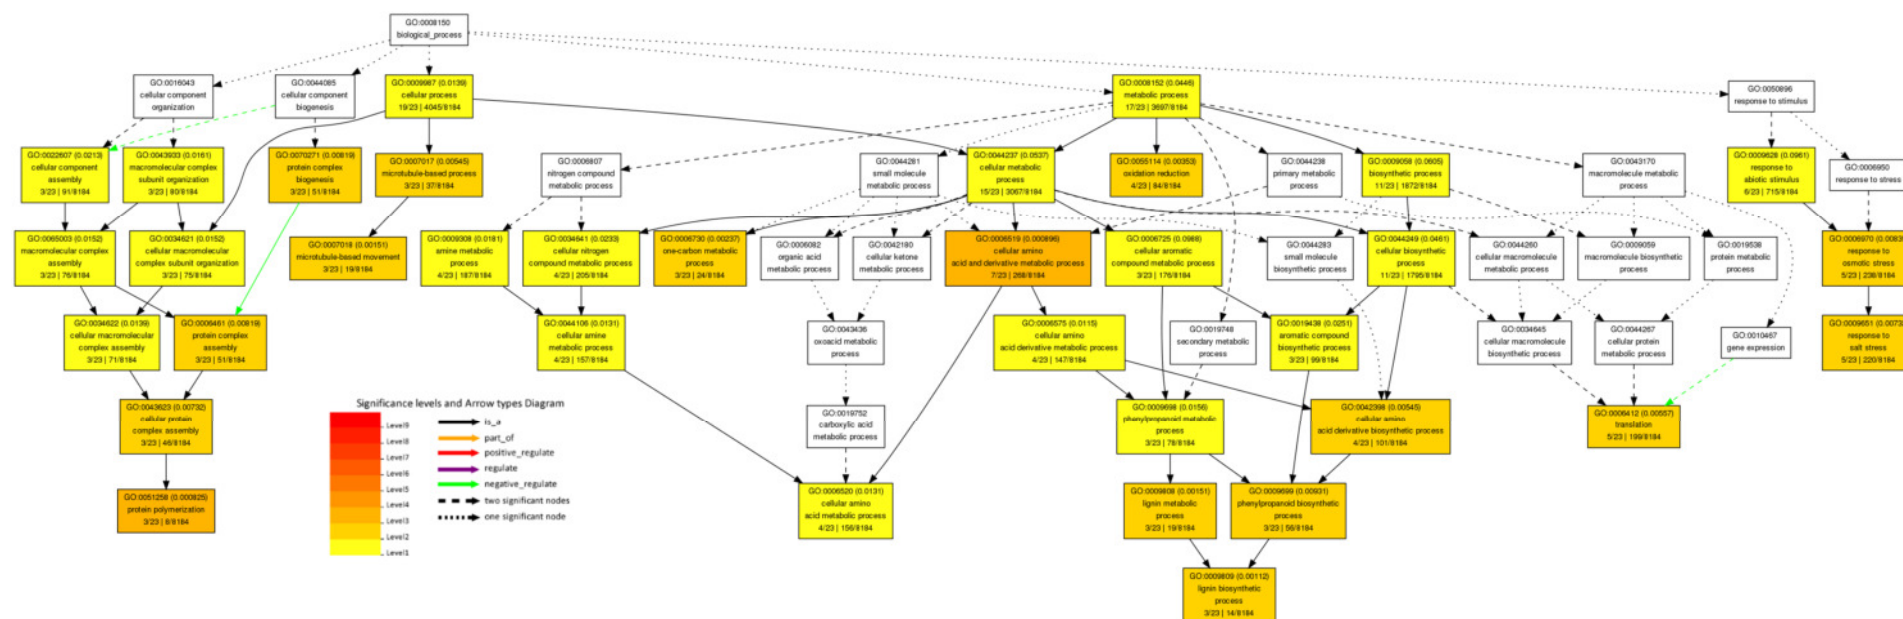

**Supplemental Fig. S1. Functional annotation of pH<sub>apo</sub>-responsive proteins to the biological process Gene Ontology.** Hierarchical tree graph of overrepresented GO terms in the biological process-category as generated by SEA. Boxes represent GO terms labelled by their GO ID, term definition and statistical information. The significant term (adjusted  $p \leq 0.05$ ) are marked with colour, while non-significant terms are shown as white boxes. The degree of colour saturation of a box is positively correlated to the enrichment level of the term. Solid, dashed, and dotted lines represent two, one and zero enriched terms at both ends connected by the line, respectively. Green lines indicate a negative regulation between connected terms. The rank direction of the graph is set to from top to bottom.
